# Supplementary material
Source: PubMed Central journal article supplement (PMC7094777)

Raw image for Extended Data Figure 1f

Lane:

1. 100 bp DNA ladder
2. GBM39
3. GBM39
4. U87
5. U87

Image was cropped to remove extra white space of the gel.

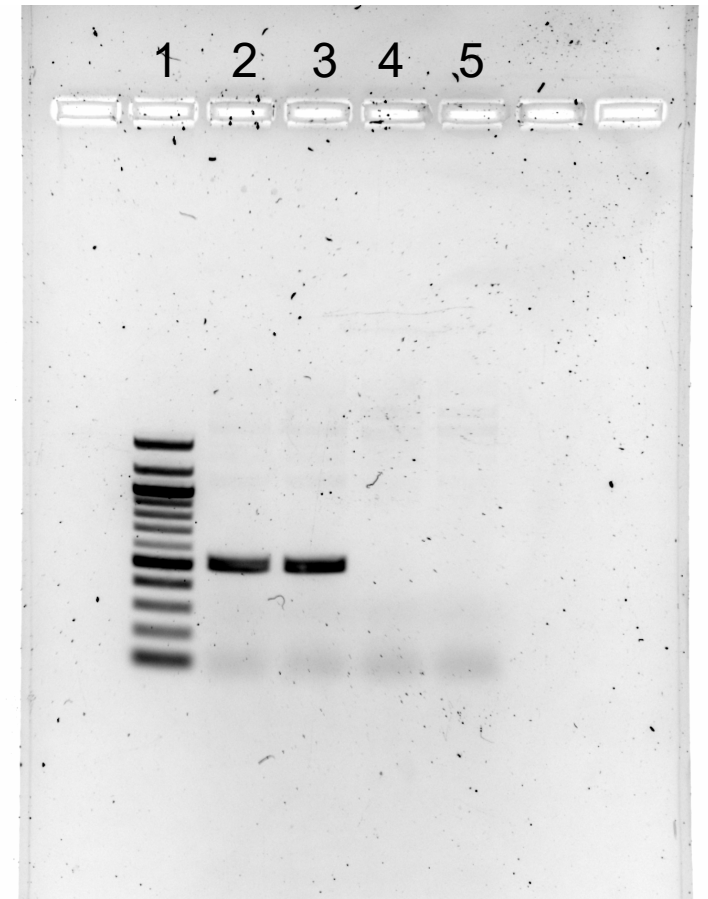

# Raw image for Extended Data Figure 10i

Lane:

1. U87 DMSO
2. U87 Erlotinib
3. U87v3 DMSO
4. U87v3 Erlotinib
5. GBM39 DMSO
6. GBM39 Erlotinib

All targets are run in the same gel. Images were cropped according to the molecular weight.

EGFR

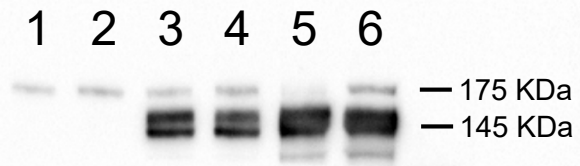

phos-EGFR (Y1068)

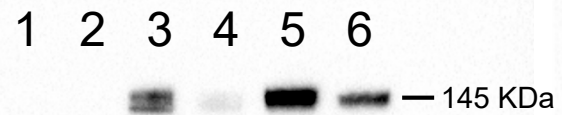

Tubulin

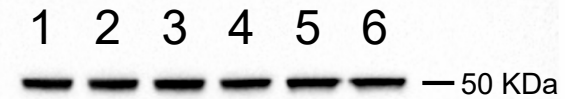

Supplement: NIHMS1065820-supplement-Sup_fig1.pdf [file NIHMS1065820-supplement-Sup_fig1.pdf]
